# Supplementary material for: Association between Duration of Exercise (MET Hours per Week) and the Risk of Decreased eGFR: A Cross-Sectional Study Based on a Large Chinese Population
Source: Hindawi journal article supplement (doi:10.1155/2019/5874603), 2019-03-21
Supplement: f1 [file 5874603.f1.pdf]

**Table S1. Characteristics of the participants in matched cohort**

| Variables                             | Total                  | Physical Activity (MET hours per week) |                     | P-value |
|---------------------------------------|------------------------|----------------------------------------|---------------------|---------|
|                                       |                        | <7.5                                   | ≥7.5                |         |
| <b>N</b>                              | 23825                  | 4765                                   | 19060               |         |
| <b>Age (y)</b>                        | 56.10 (50.60- 61.93)   | 55.8 (50.0-61.7)                       | 56.2 (50.7-62.0)    | 0.009   |
| <b>Male (%)</b>                       | 7480 (31.40%)          | 1441 (30.2%)                           | 6039 (31.7%)        | 0.009   |
| <b>BMI (kg/m2)</b>                    | 24.35 (22.25- 26.70)   | 24.3 (22.1-26.7)                       | 24.4 (22.3-26.7)    | 0.227   |
| <b>SBP (mmHg)</b>                     | 129.00 (117.00-144.00) | 129.0 (117.0-143.0)                    | 129.0 (117.0-144.0) | 0.301   |
| <b>DBP (mmHg)</b>                     | 77.00 (70.00- 85.00)   | 77.0 (70.0-84.0)                       | 77.0 (70.0-85.0)    | 0.113   |
| <b>Pulse (bpm)</b>                    | 78.00 (71.00- 86.00)   | 78.0 (72.0-86.0)                       | 78.0 (71.0-86.0)    | 0.168   |
| <b>HDL (mmol/L)</b>                   | 1.30 (1.09- 1.54)      | 1.3 (1.1-1.5)                          | 1.3 (1.1-1.5)       | 0.865   |
| <b>LDL (mmol/L)</b>                   | 2.96 (2.36- 3.59)      | 3.0 (2.4-3.6)                          | 3.0 (2.4-3.6)       | 0.914   |
| <b>TG (mmol/L)</b>                    | 1.28 (0.91- 1.84)      | 1.3 (0.9-1.9)                          | 1.3 (0.9-1.8)       | 0.380   |
| <b>GGT (mmol/L)</b>                   | 20.00 (15.00- 31.00)   | 20.0 (15.0-32.0)                       | 20.0 (15.0-31.0)    | 0.065   |
| <b>FBG (mmol/L)</b>                   | 5.49 (5.12- 5.96)      | 5.5 (5.1-6.0)                          | 5.5 (5.1-6.0)       | 0.625   |
| <b>PBG (mmol/L)</b>                   | 7.03 (5.87- 8.71)      | 7.0 (5.9-8.7)                          | 7.0 (5.9-8.7)       | 0.657   |
| <b>HbA1c (%)</b>                      | 5.80 (5.50- 6.10)      | 5.8 (5.5-6.1)                          | 5.8 (5.5-6.1)       | 0.518   |
| <b>eGFR (ml/min/1.73<sup>2</sup>)</b> |                        |                                        |                     | 0.004   |
| <b>&gt; 90</b>                        | 19386 (81.37%)         | 3946 (82.8%)                           | 15440 (81.0%)       |         |
| <b>≤ 90</b>                           | 4439 (18.63%)          | 819 (17.2%)                            | 3620 (19.0%)        |         |
| <b>Region (%)</b>                     |                        |                                        |                     | 1.000   |
| <b>Northern</b>                       | 10965 (46.02%)         | 2193 (46.0%)                           | 8772 (46.0%)        |         |
| <b>Southern</b>                       | 12860 (53.98%)         | 2572 (54.0%)                           | 10288 (54.0%)       |         |
| <b>Education (%)</b>                  |                        |                                        |                     | 0.067   |
| <b>illiteracy</b>                     | 656 (2.75%)            | 153 (3.2%)                             | 503 (2.6%)          |         |
| <b>primary school</b>                 | 2356 (9.89%)           | 477 (10.0%)                            | 1879 (9.9%)         |         |

|                                      |                |              |               |       |
|--------------------------------------|----------------|--------------|---------------|-------|
| <b>junior high school</b>            | 8459 (35.50%)  | 1649 (34.6%) | 6810 (35.7%)  |       |
| <b>senior high school</b>            | 9021 (37.86%)  | 1783 (37.4%) | 7238 (38.0%)  |       |
| <b>college</b>                       | 3333 (13.99%)  | 703 (14.8%)  | 2630 (13.8%)  |       |
| <b>Smoking status (%)</b>            |                |              |               | 0.218 |
| <b>no</b>                            | 20360 (85.46%) | 4088 (85.8%) | 16272 (85.4%) |       |
| <b>occasional smokers</b>            | 594 (2.49%)    | 102 (2.1%)   | 492 (2.6%)    |       |
| <b>regular smokers</b>               | 2871 (12.05%)  | 575 (12.1%)  | 2296 (12.0%)  |       |
| <b>Drinking status (%)</b>           |                |              |               | 0.373 |
| <b>no</b>                            | 17294 (72.59%) | 3446 (72.3%) | 13848 (72.7%) |       |
| <b>occasional drinkers</b>           | 4743 (19.91%)  | 977 (20.5%)  | 3766 (19.8%)  |       |
| <b>regular drinkers</b>              | 1788 (7.50%)   | 342 (7.2%)   | 1446 (7.6%)   |       |
| <b>Prevalence of diseases (%)</b>    |                |              |               |       |
| <b>Diabetes mellitus</b>             | 3119 (13.09%)  | 628 (13.2%)  | 2491 (13.1%)  | 0.840 |
| <b>Hypertension</b>                  | 8165 (34.27%)  | 1596 (33.5%) | 6569 (34.5%)  | 0.207 |
| <b>Cardiovascular events</b>         | 969 (4.07%)    | 187 (3.92%)  | 782 (4.10%)   | 0.577 |
| <b>Family history of disease (%)</b> |                |              |               |       |
| <b>Family history of diabetes</b>    | 4009 (16.83%)  | 753 (15.8%)  | 3256 (17.1%)  | 0.035 |
| <b>Family history of tumor</b>       | 3613 (15.16%)  | 699 (14.7%)  | 2914 (15.3%)  | 0.287 |

**Table S2. Correlation analysis between physical activity (MET hours per week) and the risk of decreased eGFR in covariate adjustment using propensity score (CAPS) model**

| Variable                                           | Non-adjusted         | P-value | Model I             | P-value |
|----------------------------------------------------|----------------------|---------|---------------------|---------|
| <b>eGFR Category</b>                               |                      |         |                     |         |
| <b>Physical Activity (MET hours per week)</b>      |                      |         |                     |         |
| <7.5                                               | 1.0                  |         | 1.0                 |         |
| ≥7.5                                               | 1.1 (1.0, 1.2)       | 0.0038  | 1.10 (1.01, 1.19)   | 0.0352  |
| <b>Continuous eGFR (ml/min/1.73 m<sup>2</sup>)</b> |                      |         |                     |         |
| <b>Physical Activity (MET hours per week)</b>      |                      |         |                     |         |
| <7.5                                               | 0                    |         | 0                   |         |
| ≥7.5                                               | -0.61 (-1.07, -0.16) | 0.0084  | -0.42 (-0.88, 0.04) | 0.0704  |

Non-adjusted model

Model I adjusted for: propensity score

**Table S3. Correlation analysis between physical activity (MET hours per week) and the risk of decreased eGFR in subgroups using CAPS model**

| Variable                                           | Non-adjusted      | P-value | Model I           | P-value |
|----------------------------------------------------|-------------------|---------|-------------------|---------|
| <b>Age &lt;55 years</b>                            |                   |         |                   |         |
| <b>eGFR Category</b>                               |                   |         |                   |         |
| <b>Physical Activity (MET hours per week)</b>      |                   |         |                   |         |
| <7.5                                               | 1.0               |         | 1.0               |         |
| ≥7.5                                               | 1.33 (0.99, 1.79) | 0.0552  | 1.30 (0.97, 1.75) | 0.0832  |
| <b>Continuous eGFR (ml/min/1.73 m<sup>2</sup>)</b> |                   |         |                   |         |

|                        |                                               |                      |         |                      |        |
|------------------------|-----------------------------------------------|----------------------|---------|----------------------|--------|
|                        | Physical Activity (MET hours per week)        |                      |         |                      |        |
|                        | <7.5                                          | 0                    |         | 0                    |        |
|                        | ≥7.5                                          | -0.25 (-0.61, 0.11)  | 0.1769  | -0.17 (-0.53, 0.19)  | 0.3500 |
| <b>Age 55-64 years</b> | eGFR Category                                 |                      |         |                      |        |
|                        | Physical Activity (MET hours per week)        |                      |         |                      |        |
|                        | <7.5                                          | 1.0                  |         | 1.0                  |        |
|                        | ≥7.5                                          | 1.20 (1.04, 1.38)    | 0.0118  | 1.16 (1.00, 1.33)    | 0.0459 |
|                        | Continuous eGFR (ml/min/1.73 m <sup>2</sup> ) |                      |         |                      |        |
|                        | Physical Activity (MET hours per week)        |                      |         |                      |        |
|                        | <7.5                                          | 0                    |         | 0                    |        |
|                        | ≥7.5                                          | -0.85 (-1.44, -0.27) | 0.0042  | -0.69 (-1.27, -0.10) | 0.0223 |
| <b>Age ≥65 years</b>   | eGFR Category                                 |                      |         |                      |        |
|                        | Physical Activity (MET hours per week)        |                      |         |                      |        |
|                        | <7.5                                          | 1.0                  |         | 1.0                  |        |
|                        | ≥7.5                                          | 1.05 (0.87, 1.28)    | 0.5991  | 1.03 (0.85, 1.25)    | 0.7449 |
|                        | Continuous eGFR (ml/min/1.73 m <sup>2</sup> ) |                      |         |                      |        |
|                        | Physical Activity (MET hours per week)        |                      |         |                      |        |
|                        | <7.5                                          | 0                    |         | 0                    |        |
|                        | ≥7.5                                          | 0.02 (-1.79, 1.83)   | 0.9839  | 0.13 (-1.67, 1.93)   | 0.8868 |
| <b>Non-diabetes</b>    | eGFR Category                                 |                      |         |                      |        |
|                        | Physical Activity (MET hours per week)        |                      |         |                      |        |
|                        | <7.5                                          | 1.0                  |         | 1.0                  |        |
|                        | ≥7.5                                          | 1.31 (1.15, 1.49)    | <0.0001 | 1.25 (1.10, 1.43)    | 0.0007 |
|                        | Continuous eGFR (ml/min/1.73 m <sup>2</sup> ) |                      |         |                      |        |
|                        | Physical Activity (MET hours per week)        |                      |         |                      |        |
|                        | <7.5                                          | 0                    |         | 0                    |        |

|                    |                                               |                      |         |                      |        |
|--------------------|-----------------------------------------------|----------------------|---------|----------------------|--------|
|                    | ≥7.5                                          | -1.11 (-1.65, -0.58) | <0.0001 | -0.91 (-1.44, -0.38) | 0.0008 |
| <b>Prediabetes</b> | eGFR Category                                 |                      |         |                      |        |
|                    | Physical Activity (MET hours per week)        |                      |         |                      |        |
|                    | <7.5                                          | 1.0                  |         | 1.0                  |        |
|                    | ≥7.5                                          | 1.02 (0.88, 1.20)    | 0.7684  | 1.00 (0.85, 1.17)    | 0.9706 |
|                    | Continuous eGFR (ml/min/1.73 m <sup>2</sup> ) |                      |         |                      |        |
|                    | Physical Activity (MET hours per week)        |                      |         |                      |        |
|                    | <7.5                                          | 0                    |         | 0                    |        |
|                    | ≥7.5                                          | -0.37 (-1.28, 0.54)  | 0.4259  | -0.21 (-1.12, 0.70)  | 0.6546 |
| <b>Diabetes</b>    | eGFR Category                                 |                      |         |                      |        |
|                    | Physical Activity (MET hours per week)        |                      |         |                      |        |
|                    | <7.5                                          | 1.0                  |         | 1.0                  |        |
|                    | ≥7.5                                          | 0.68 (0.53, 0.88)    | 0.0035  | 0.65 (0.50, 0.85)    | 0.0012 |
|                    | Continuous eGFR (ml/min/1.73 m <sup>2</sup> ) |                      |         |                      |        |
|                    | Physical Activity (MET hours per week)        |                      |         |                      |        |
|                    | <7.5                                          | 0                    |         | 0                    |        |
|                    | ≥7.5                                          | 1.07 (-0.44, 2.58)   | 0.1635  | 1.25 (-0.26, 2.76)   | 0.1055 |

Non-adjusted model

Model I adjusted for: propensity score

**Table S4. Correlation analysis between physical activity (MET hours per week) and the risk of decreased eGFR in IFG, IGT and IFG+IGT groups using CAPS model**

|            | Variable                               | Non-adjusted | P-value | Model I | P-value |
|------------|----------------------------------------|--------------|---------|---------|---------|
| <b>IFG</b> | eGFR Category                          |              |         |         |         |
|            | Physical Activity (MET hours per week) |              |         |         |         |

|                |                                               |                     |        |                     |        |
|----------------|-----------------------------------------------|---------------------|--------|---------------------|--------|
|                | <7.5                                          | 1.0                 |        | 1.0                 |        |
|                | ≥7.5                                          | 1.41 (0.79, 2.53)   | 0.2506 | 1.36 (0.76, 2.45)   | 0.3017 |
|                | Continuous eGFR (ml/min/1.73 m <sup>2</sup> ) |                     |        |                     |        |
|                | Physical Activity (MET hours per week)        |                     |        |                     |        |
|                | <7.5                                          | 0                   |        | 0                   |        |
|                | ≥7.5                                          | -0.91 (-3.00, 1.19) | 0.3958 | -0.68 (-2.76, 1.39) | 0.5194 |
| <b>IGT</b>     | eGFR Category                                 |                     |        |                     |        |
|                | Physical Activity (MET hours per week)        |                     |        |                     |        |
|                | <7.5                                          | 1.0                 |        | 1.0                 |        |
|                | ≥7.5                                          | 0.95 (0.77, 1.18)   | 0.6615 | 0.94 (0.76, 1.16)   | 0.5547 |
|                | Continuous eGFR (ml/min/1.73 m <sup>2</sup> ) |                     |        |                     |        |
|                | Physical Activity (MET hours per week)        |                     |        |                     |        |
|                | <7.5                                          | 0                   |        | 0                   |        |
|                | ≥7.5                                          | -0.45 (-1.59, 0.69) | 0.4386 | -0.33 (-1.47, 0.81) | 0.5710 |
| <b>IFG+IGT</b> | eGFR Category                                 |                     |        |                     |        |
|                | Physical Activity (MET hours per week)        |                     |        |                     |        |
|                | <7.5                                          | 1.0                 |        | 1.0                 |        |
|                | ≥7.5                                          | 0.95 (0.54, 1.65)   | 0.8468 | 0.92 (0.53, 1.62)   | 0.7848 |
|                | Continuous eGFR (ml/min/1.73 m <sup>2</sup> ) |                     |        |                     |        |
|                | Physical Activity (MET hours per week)        |                     |        |                     |        |
|                | <7.5                                          | 0                   |        | 0                   |        |
|                | ≥7.5                                          | 0.42 (-1.91, 2.75)  | 0.7214 | 0.71 (-1.62, 3.03)  | 0.5512 |

Non-adjusted model

Model I adjusted for: propensity score
